# Supplementary material for: Magnetic Fe nanoparticle functionalized water-soluble multi-walled carbon nanotubules towards the preparation of sorbent for aromatic compounds removal
Source: Royal Society of Chemistry journal article supplement (doi:10.1039/b610842c), 2006-12-14
Supplement: suppinf.doc [file suppinf.doc]

This journal is © The Royal Society of Chemistry 2006

**Magnetic Fe Nanoparticle Functionalized Water-soluble Multi-Walled Carbon Nanotubles toward the Preparation of Sorbent for Aromatic Compounds Removal**

Jin Jun, Rong Li, Huangling Wang, Hangling Chen, Kun Liang and Jiantai Ma*

* College of Chemistry and Chemical Engineering, Lanzhou University, Lanzhou, 730000, P. R. China. Fax: +86-931-891-2582.; Tel: +86-931-891-2311; E-mail: majiantai@lzu.edu.cn

MWNTs generated via chemical vapor deposition (CVD) method were purchased from Shenzhen nanoport (Shenzhen. China), and their purity was over 90%. Other reagents including Fe(NO3)3·9H2O , AIBN, toluene, sodium hydroxide, methanol and four model aromatic compounds were A. R. grade and were used as supplied.

Preparation of magnetic Fe nanoparticle functionalized multi-wall carbon nanotubes (Fe-MWNTs-CH2COONa)

1) Preparation of Fe-MWNTs

200 mg MWNTs were dispersed in 20 wt.% Fe(NO3)3·9H2O solution with the help of an ultrasonic bath. After draining the excess of water on a rotary evaporator with a vacuum pump and calcined for 0.5 h, the samples were reduced using H2 at 560 oC for 1.5 h and at 900 oC for 1 h successively in the flow of H2 and Ar (the ratio of which was 1: 10 with 5 oC·min-1) . Thus, Fe-MWNTs were obtained.

2)Preparation of Fe-MWNTs-CN

180 mg Fe-MWNTs were dispersed in 180 mL toluene by strong stirring for 30 min. Then, under continuous stirring, 36 mL toluene solution containing 11.52 g AIBN was added to the dispersion. Subsequently, in a Ar atmosphere, the resulting dispersion was heated at 75 oC for 4h. The product was washed with toluene repeatedly and dried in vacuum at 40 oC overnight, thus, Fe-MWNTs-cyano (Fe-MWNTs-CN) were produced.

3) Preparation of Fe-MWNTs-CH2COONa

To prepare Fe-MWNTs-CH2COONa, 100 mg Fe-MWNTs-CN were dispersed in a mixture of methanol and 10 M sodium hydroxide, the resulting materials were subjected to refluxing at 60 oC for 48 h. The product was washed with distilled water for several times. Finally, the purified Fe-MWNTs-CH2COONa was dried in vacuum at 40 oC overnight.

FT-IR Characterization

The FT-IR spectra of raw MWNTs, Fe-MWNTs, Fe-MWNTs-CN and Fe-MWNTs-CH2COONa were shown in Figure S1. Compared with the spectra of raw MWNTs (Figure S1a), the intensity of most of peaks became weak and a few peaks (Figure S1b) disappeared because a few organic groups decomposed in high temperature. Compared with the spectra of Fe-MWNTs in Figure S1b, there appeared a characteristic peak of cyano groups at ca. 2234 cm-1 in Figure S1c, which proved that carbon radicals originated from AIBN were efficiently grafted onto Fe-MWNTs. As shown in Figure S1d, the disappearance of the peak of -CN groups and the appearance of peak at 1637 nm-1 confirmed that carboxylic sodium were produced via hydrolysis of -CN groups on Fe-MWNTs. The water solubility of Fe-MWNTs-CH2COONa was highly improved, because of the grafting of carboxylic sodium groups on Fe-MWNTs.


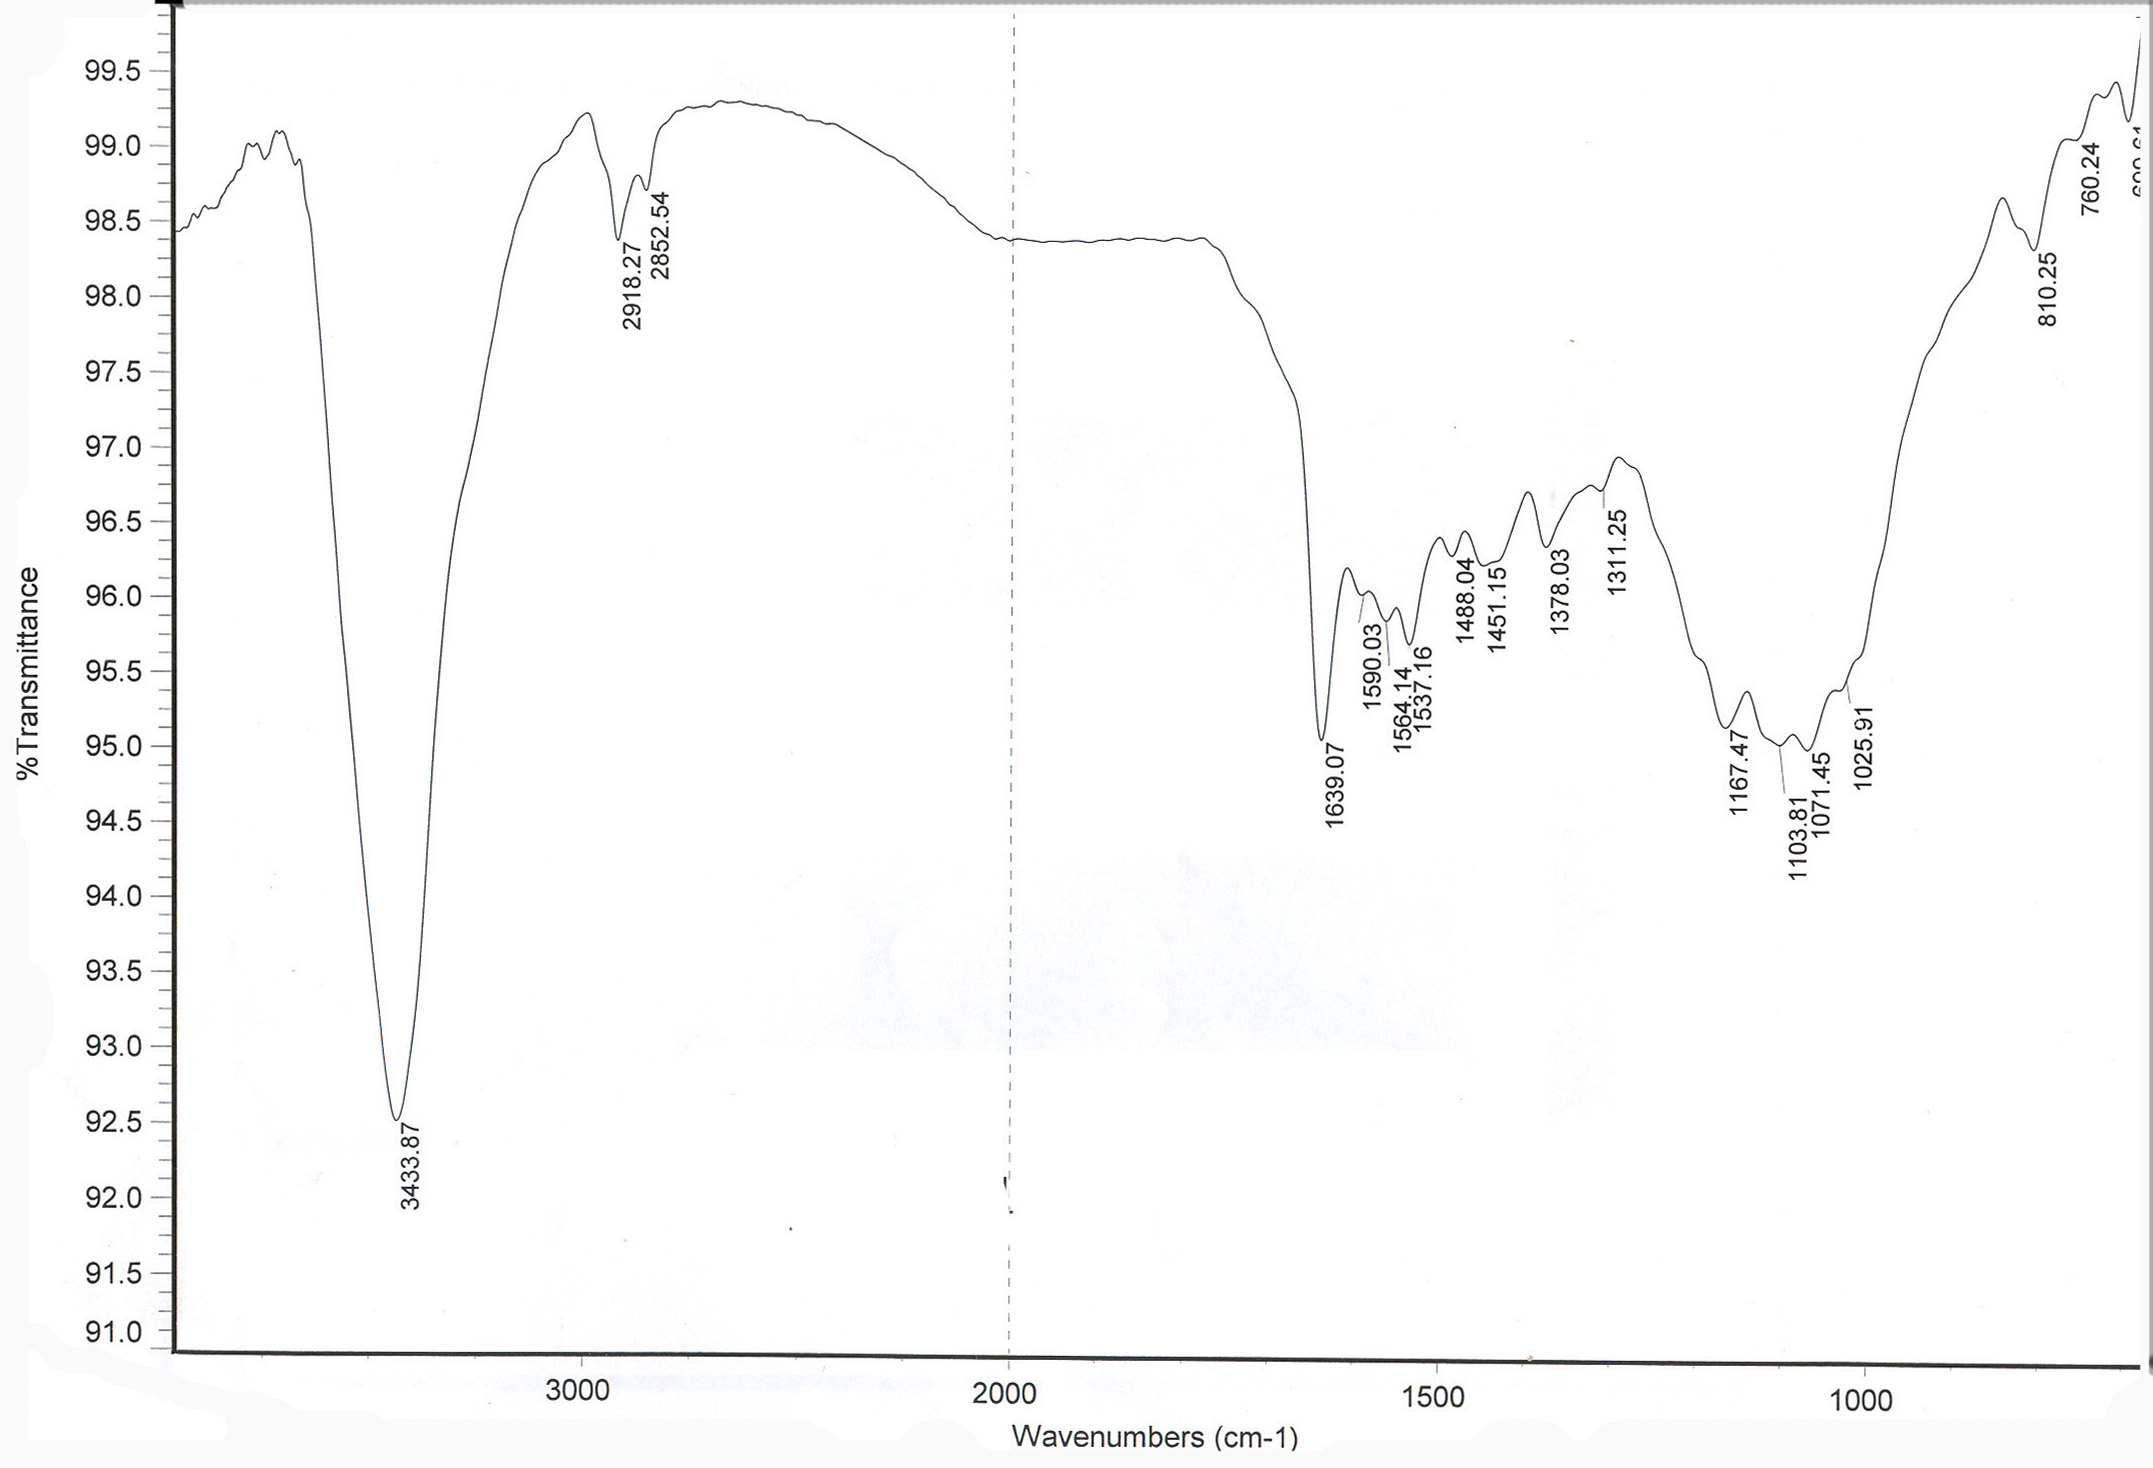


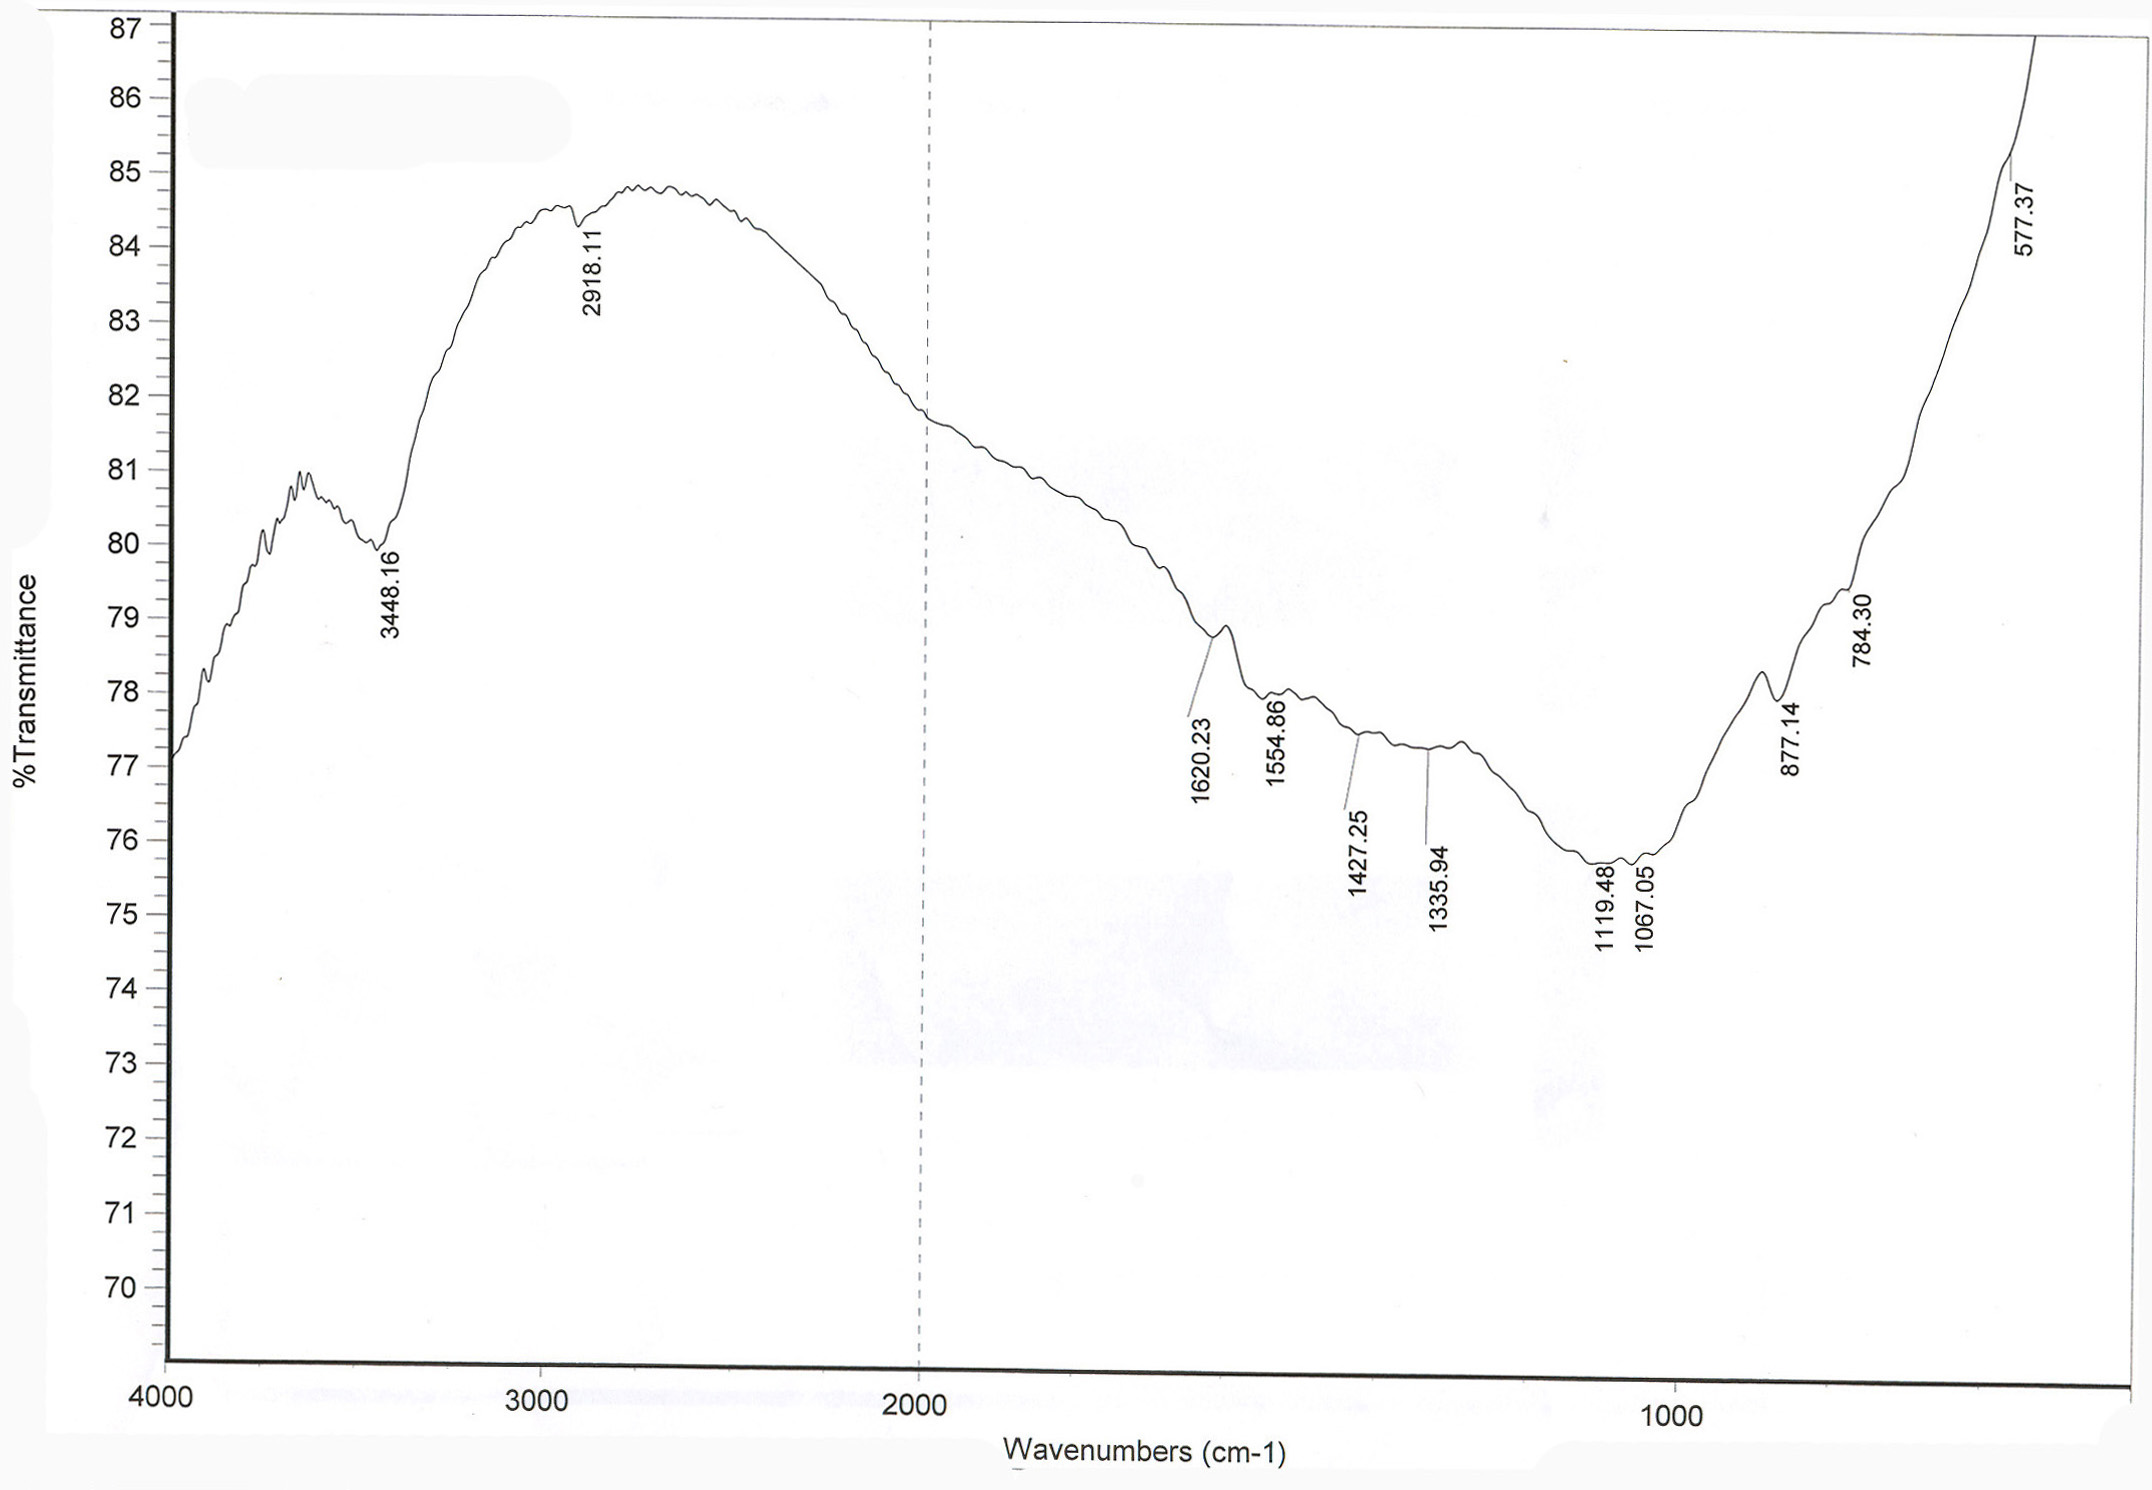

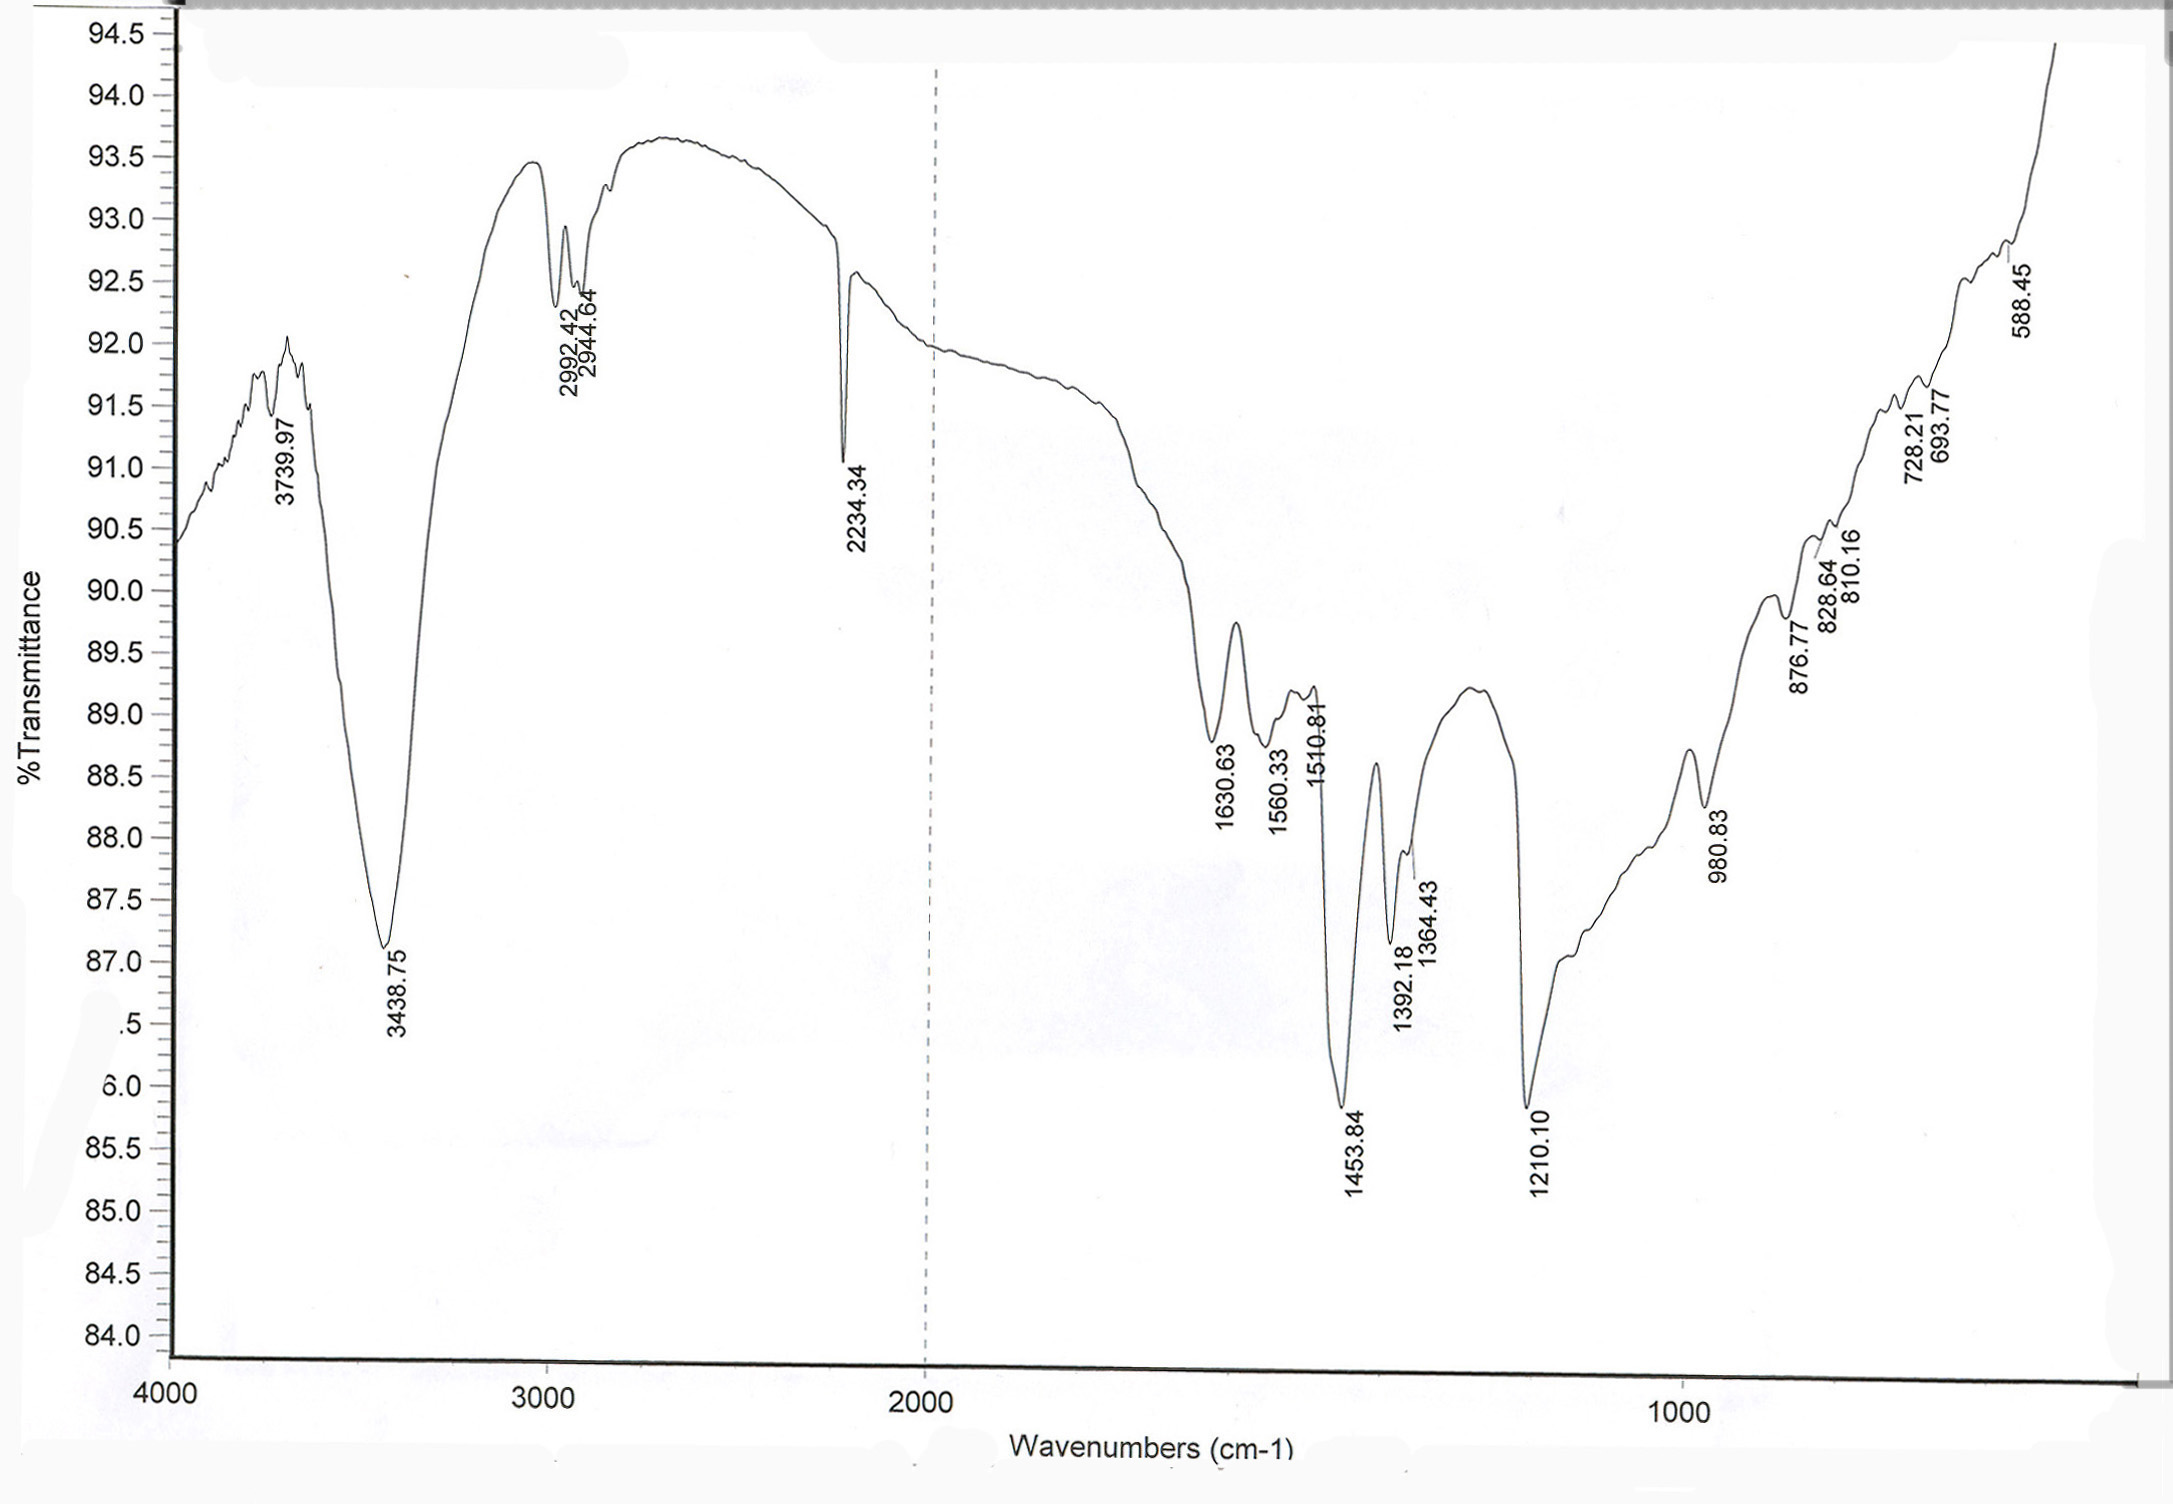

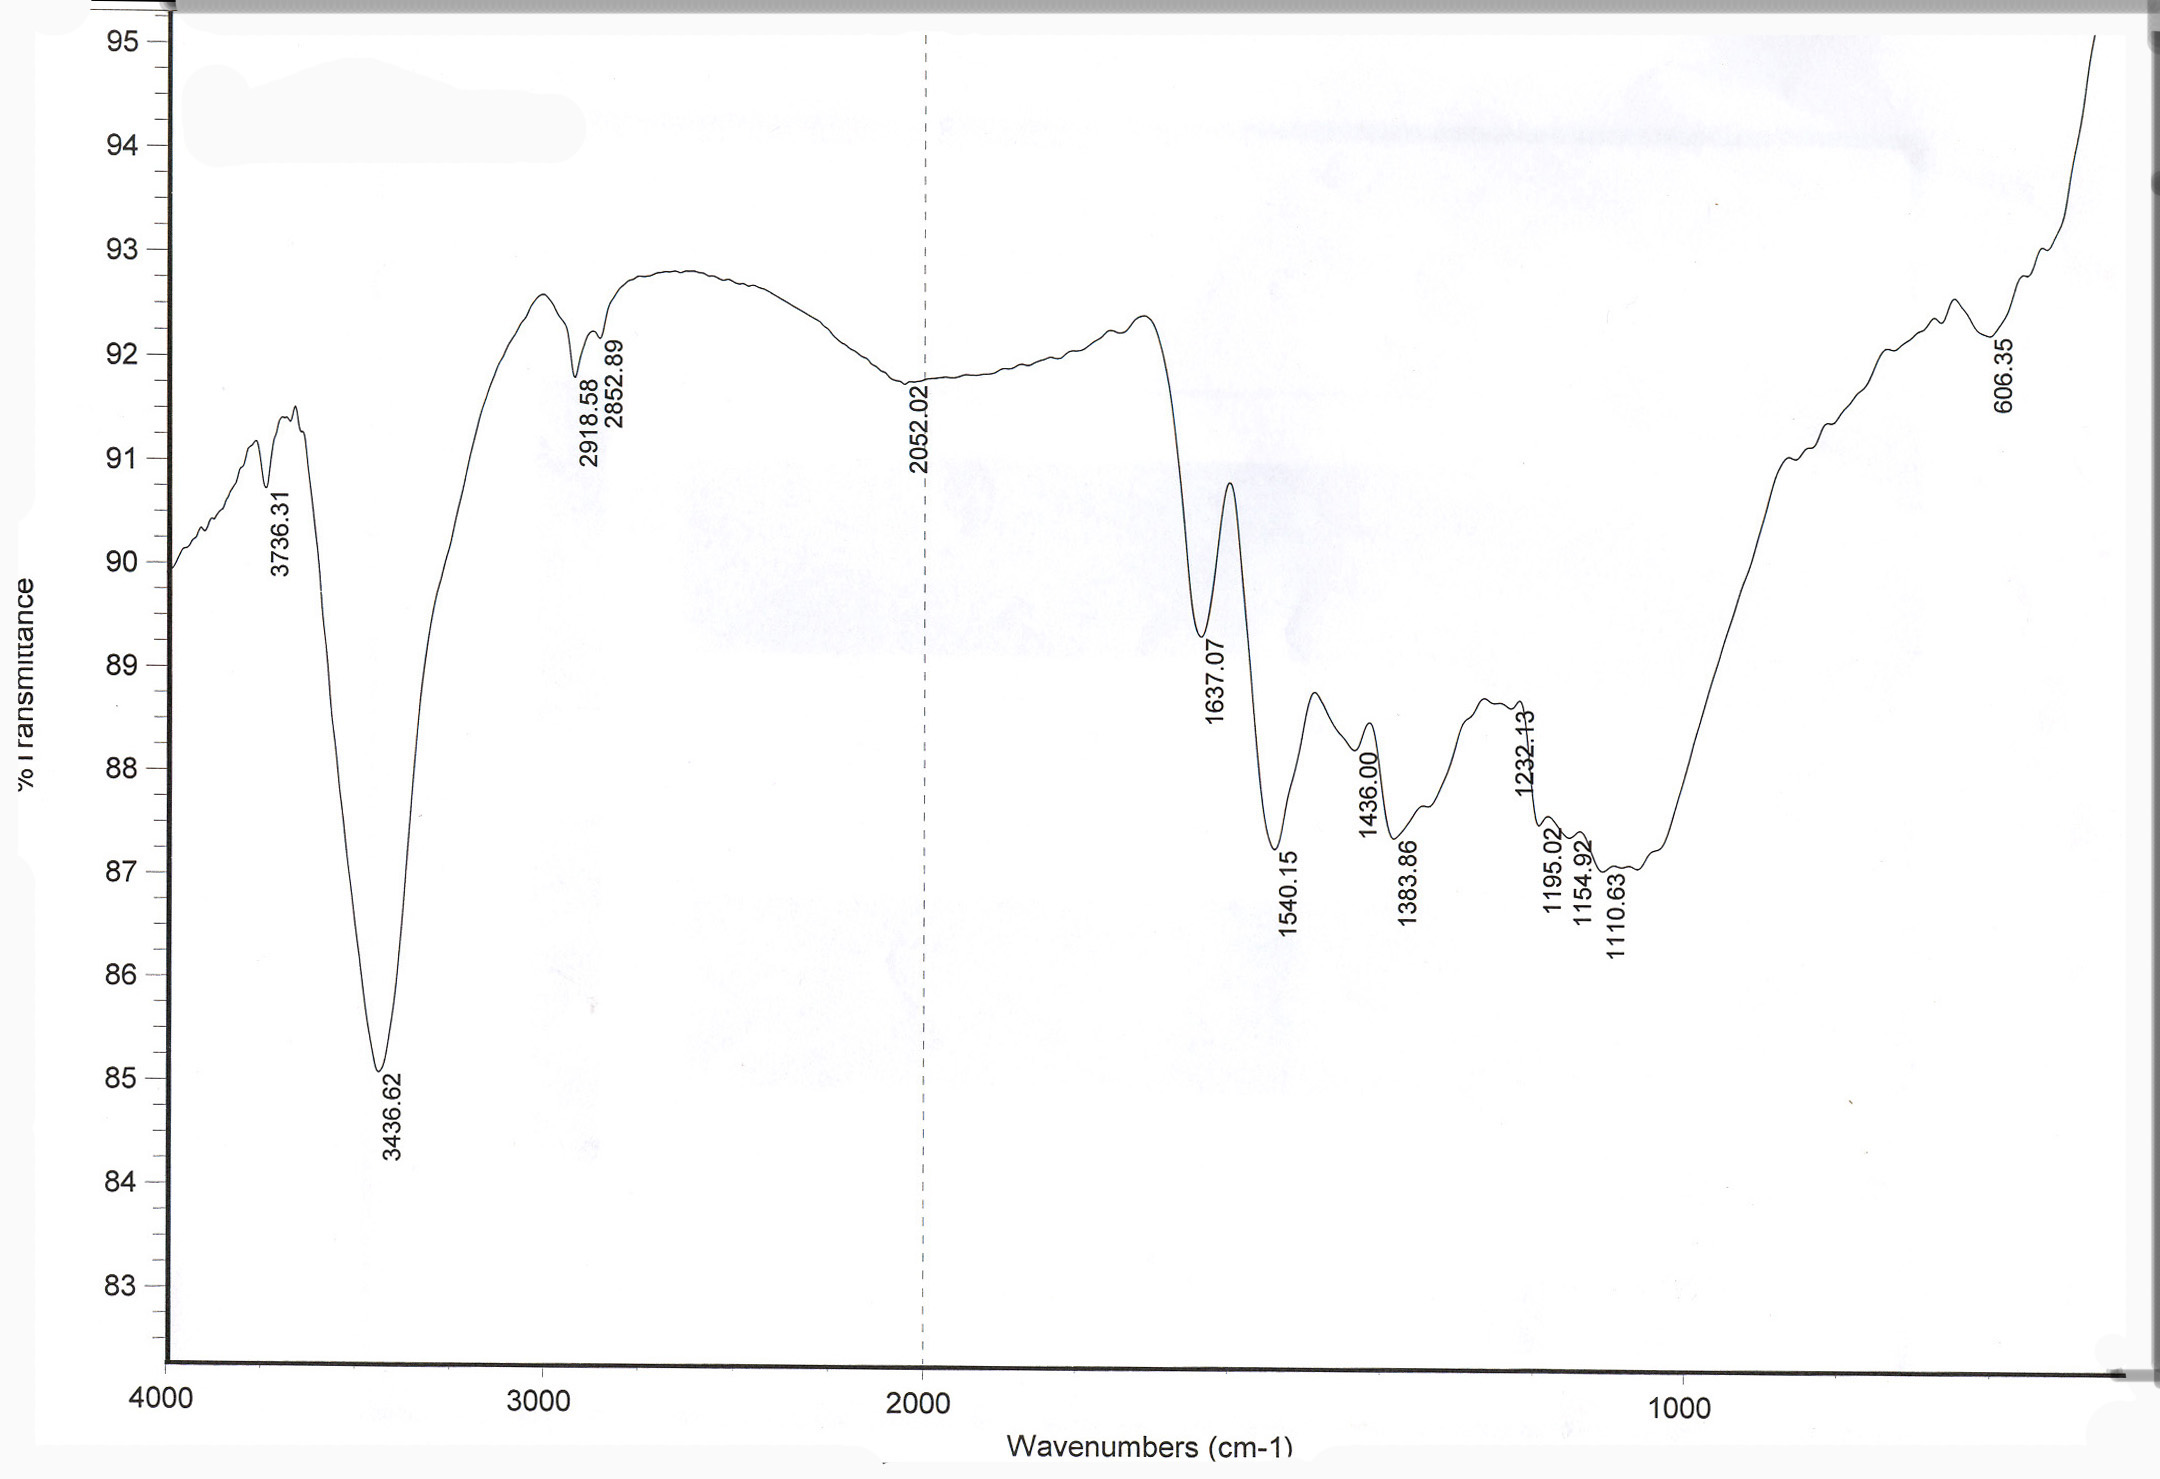


a

b

c

d

Figure S1 FT-IR spectra of raw MWNTs (a), Fe-MWNTs (b), Fe-MWNTs-CN (c), Fe-MWNTs-CH2COONa (d).

XRD Characterization


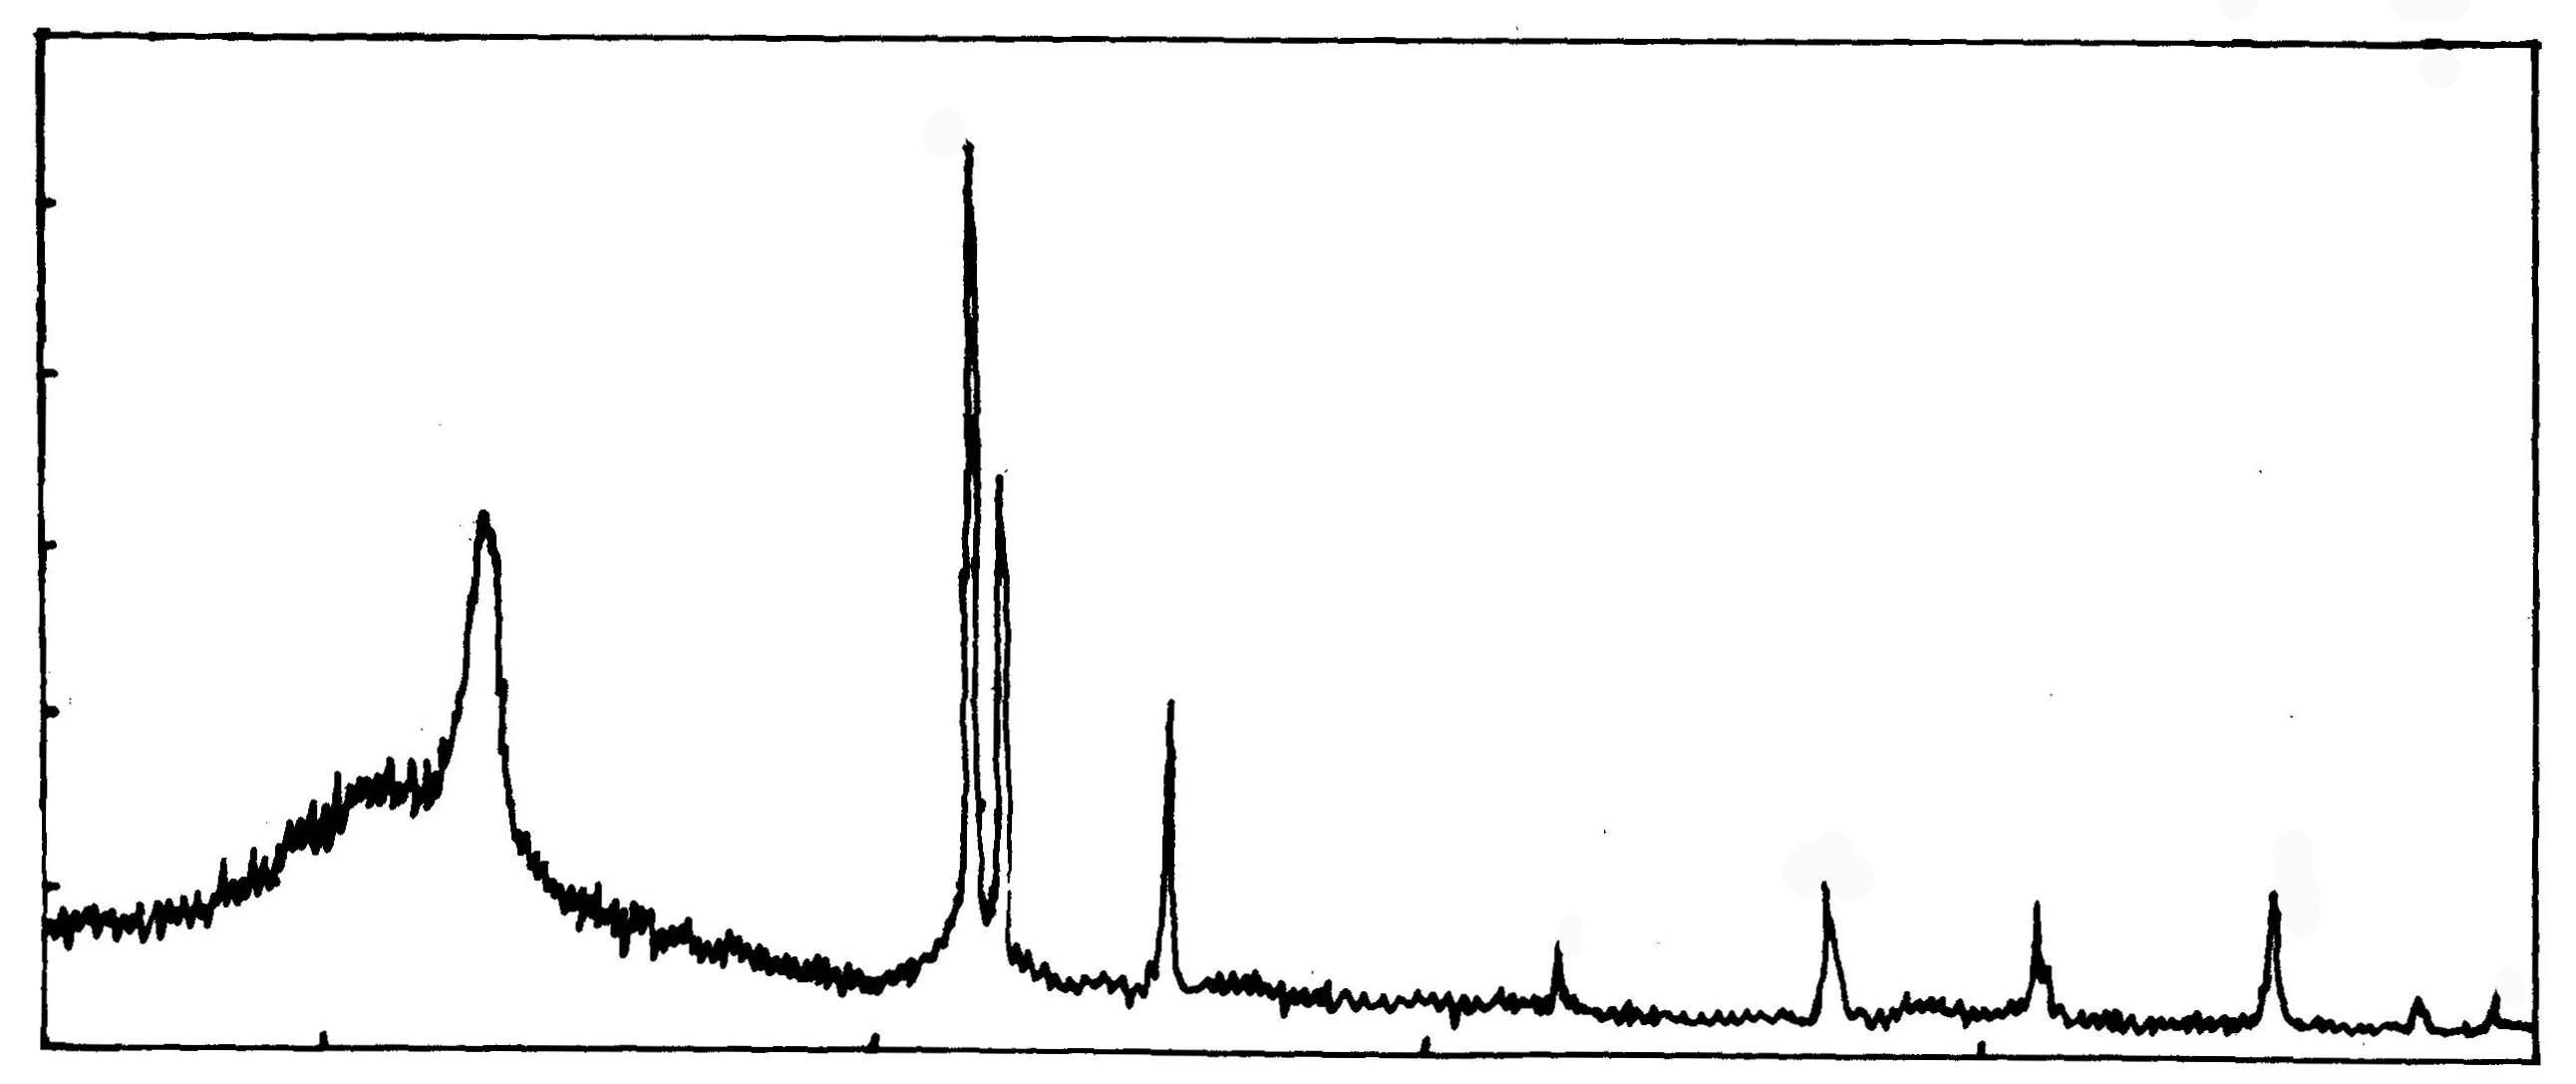


**20 40 60 80**

**2-theta(degrees)**

（110）



（200）



（211）



（220）



（002）



（100）

（102）



 MWNTs

 Fe

Figure S2 XRD pattern of Fe-MWNTs-CH2COONa

The XRD pattern of Fe-MWNTs-CH2COONa was represented in Figure S2. The peaks appearing at 2θ= 26.2 o, 43.6o and 50.7 o are characteristic of the graphite of carbon nanotubes, and the peaks appearing at 44.6 o, 64.9 o, 82.2 o and 98.8 o are characteristic of the presence of the Fe metal. Obviously, the diffraction peaks of Fe inside Fe-MWNTs-CH2COONa were quite wide, indicating that Fe particles were very small. To evaluate the grain size of powder, Scherrer equation was applied. This equation was written as where  was the wavelength of X-ray (1.5418Å) for CuK radiation, θwas the Bragg angle, and

(1)

is full width at half the maximum intensity of peak. According to equation 1, the grains size of Fe inside Fe-MWNTs-CH2COONa was around 11.25 nm.
